# Supplementary material for: Parenting Stress and Social Style in Mothers and Fathers of Children with Autism Spectrum Disorder: A Cross-Cultural Investigation in Italy and Japan
Source: MDPI journal article supplement (doi:10.3390/brainsci11111419), 2021-10-27
Supplement: s1 [file s1]

**Table S1.** Correlation between variables of Italian mothers

| <i>Variables</i>                              | PSI-SF Parental Distress | PSI-SF Parent-Child Dysfunctional Interaction | PSI-SF Difficult Child | PSI-SF Total Stress | Parenting Social Style |
|-----------------------------------------------|--------------------------|-----------------------------------------------|------------------------|---------------------|------------------------|
| PSI-SF Parental Distress                      | 1                        | .575**                                        | .436**                 | .782**              | -.153                  |
| PSI-SF Parent-Child Dysfunctional Interaction | .575**                   | 1                                             | .617**                 | .876**              | -.308*                 |
| PSI-SF Difficult Child                        | .436**                   | .617**                                        | 1                      | .841**              | -.192                  |
| PSI-SF Total Stress                           | .782**                   | .876**                                        | .841**                 | 1                   | -.262                  |
| Parenting Social Style                        | -.153                    | -.308*                                        | -.192                  | -.262               | 1                      |

Note. PSI-SF: Parenting Stress Index – Short Form; \*  $p < 0.05$ ; \*\*  $p < 0.01$ .

**Table S2.** Correlations between variables of Italian fathers

| <i>Variables</i>                              | PSI-SF Parental Distress | PSI-SF Parent-Child Dysfunctional Interaction | PSI-SF Difficult Child | PSI-SF Total Stress | Parenting Social Style |
|-----------------------------------------------|--------------------------|-----------------------------------------------|------------------------|---------------------|------------------------|
| PSI-SF Parental Distress                      | 1                        | .716**                                        | .550**                 | .855**              | -.145                  |
| PSI-SF Parent-Child Dysfunctional Interaction | .716**                   | 1                                             | .654**                 | .890**              | -.348*                 |
| PSI-SF Difficult Child                        | .550**                   | .654**                                        | 1                      | .867**              | -.133                  |
| PSI-SF Total Stress                           | .855**                   | .890**                                        | .867**                 | 1                   | -.229                  |
| Parenting Social Style                        | -.145                    | -.348*                                        | -.133                  | -.229               | 1                      |

Note. PSI-SF: Parenting Stress Index – Short Form; \*  $p < 0.05$ ; \*\*  $p < 0.01$ .

**Table S3.** Correlations between variables of Japanese mothers

| <i>Variables</i>                              | PSI-SF Parental Distress | PSI-SF Parent-Child Dysfunctional Interaction | PSI-SF Difficult Child | PSI-SF Total Stress | Parenting Social Style |
|-----------------------------------------------|--------------------------|-----------------------------------------------|------------------------|---------------------|------------------------|
| PSI-SF Parental Distress                      | 1                        | .464**                                        | .603**                 | .852**              | -.144                  |
| PSI-SF Parent-Child Dysfunctional Interaction | .464**                   | 1                                             | .475**                 | .691**              | -.588**                |
| PSI-SF Difficult Child                        | .603**                   | .475**                                        | 1                      | .878**              | -.075                  |
| PSI-SF Total Stress                           | .852**                   | .691**                                        | .878**                 | 1                   | -.271                  |
| Parenting Social Style                        | -.144                    | -.588**                                       | -.075                  | -.271               | 1                      |

Note. PSI-SF: Parenting Stress Index – Short Form; \*  $p < 0.05$ ; \*\*  $p < 0.01$ .

**Table S4.** Correlations between variables of Japanese fathers

| <i>Variables</i>                              | PSI-SF Parental Distress | PSI-SF Parent-Child Dysfunctional Interaction | PSI-SF Difficult Child | PSI-SF Total Stress | Parenting Social Style |
|-----------------------------------------------|--------------------------|-----------------------------------------------|------------------------|---------------------|------------------------|
| PSI-SF Parental Distress                      | 1                        | .316*                                         | .383*                  | .762**              | -.055                  |
| PSI-SF Parent-Child Dysfunctional Interaction | .316*                    | 1                                             | .465**                 | .743**              | -.668**                |
| PSI-SF Difficult Child                        | .383*                    | .465**                                        | 1                      | .801**              | -.402**                |
| PSI-SF Total Stress                           | .762**                   | .743**                                        | .801**                 | 1                   | -.463**                |
| Parenting Social Style                        | -.055                    | -.668**                                       | -.402**                | -.463**             | 1                      |

Note. PSI-SF: Parenting Stress Index – Short Form; \*  $p < 0.05$ ; \*\*  $p < 0.01$ .
